# Supplementary material for: An Integrated Characterization of Jujube (Ziziphus jujuba Mill.) Grown in the North Adriatic Region
Source: PubMed Central journal article supplement — Food Technol Biotechnol. 2019 Mar;57(1):17–28. doi: 10.17113/ftb.57.01.19.5910 (PMC6600307; doi:10.17113/ftb.57.01.19.5910), 2019-03
Supplement: FTB-57-017-S1.pdf [file FTB-57-017-S1.pdf]

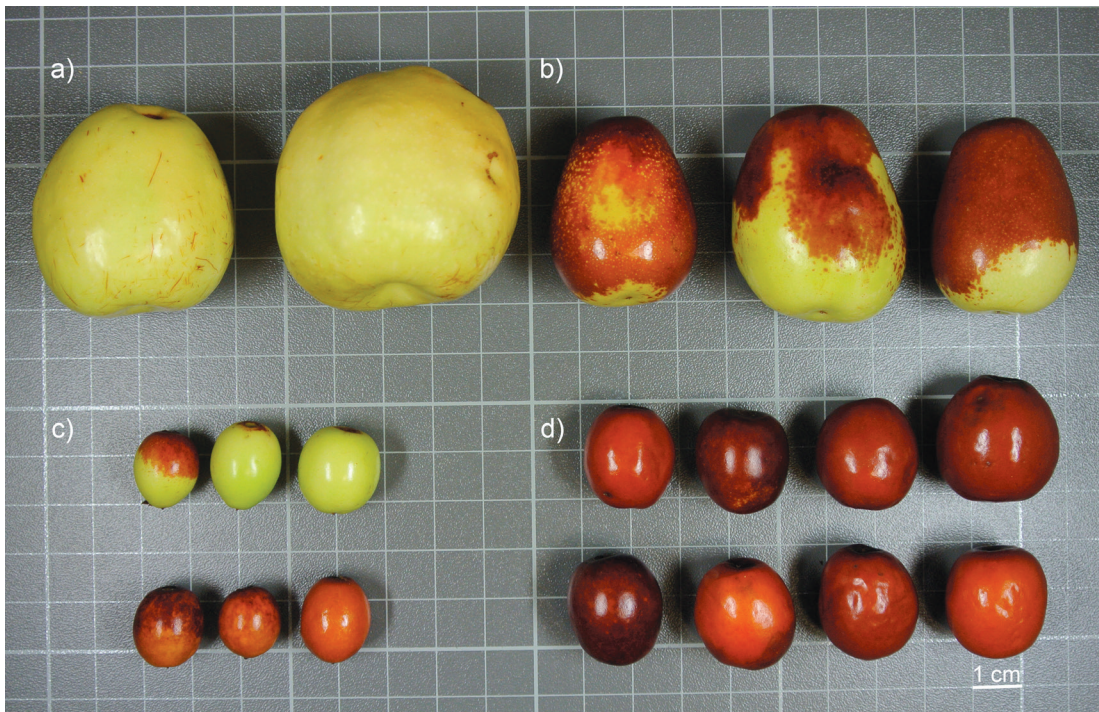

**Fig. S1.** Fruit characteristics of: a) variety 'Li', b) variety 'Lang', c) sample Zj17 (tree formed from the rootstock after scion had been detached), and d) variety 'Navadna žižola'

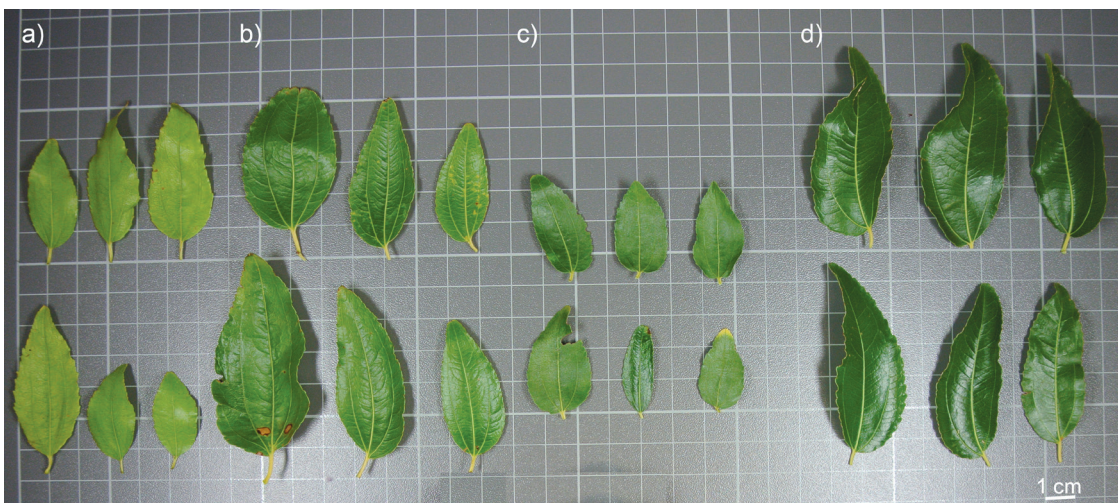

**Fig. S2.** Leaf characteristics of: a) variety 'Li', b) variety 'Lang', c) sample Zj17 (tree formed from the rootstock after scion had been detached), and d) variety 'Navadna žižola'
